# Supplementary material
Source: publisher figshare collection journal article supplement (https://diabetesjournals.figshare.com/ndownloader/files/24444113)
Supplement: Supplementary file 1 [file 24444113]

## Supplementary Material

### Supplementary Figures

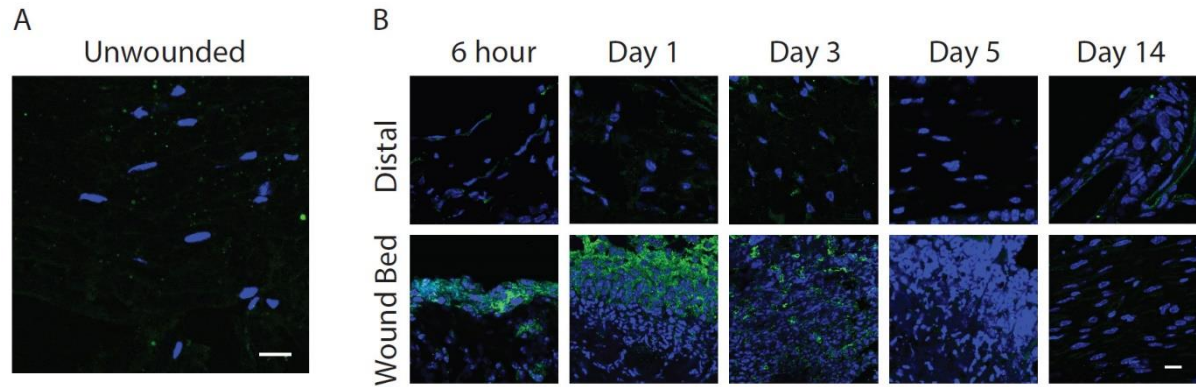

**Figure S1.** Lrg1 expression in mouse skin. Immunofluorescence staining detecting LRG1 (green) or DAPI (4',6-diamidino-2-phenylindole; blue) in **A**) unwounded normal skin and **B**) distal intact skin and wound bed at different time points following wound creation. Scale bar: 20μm.

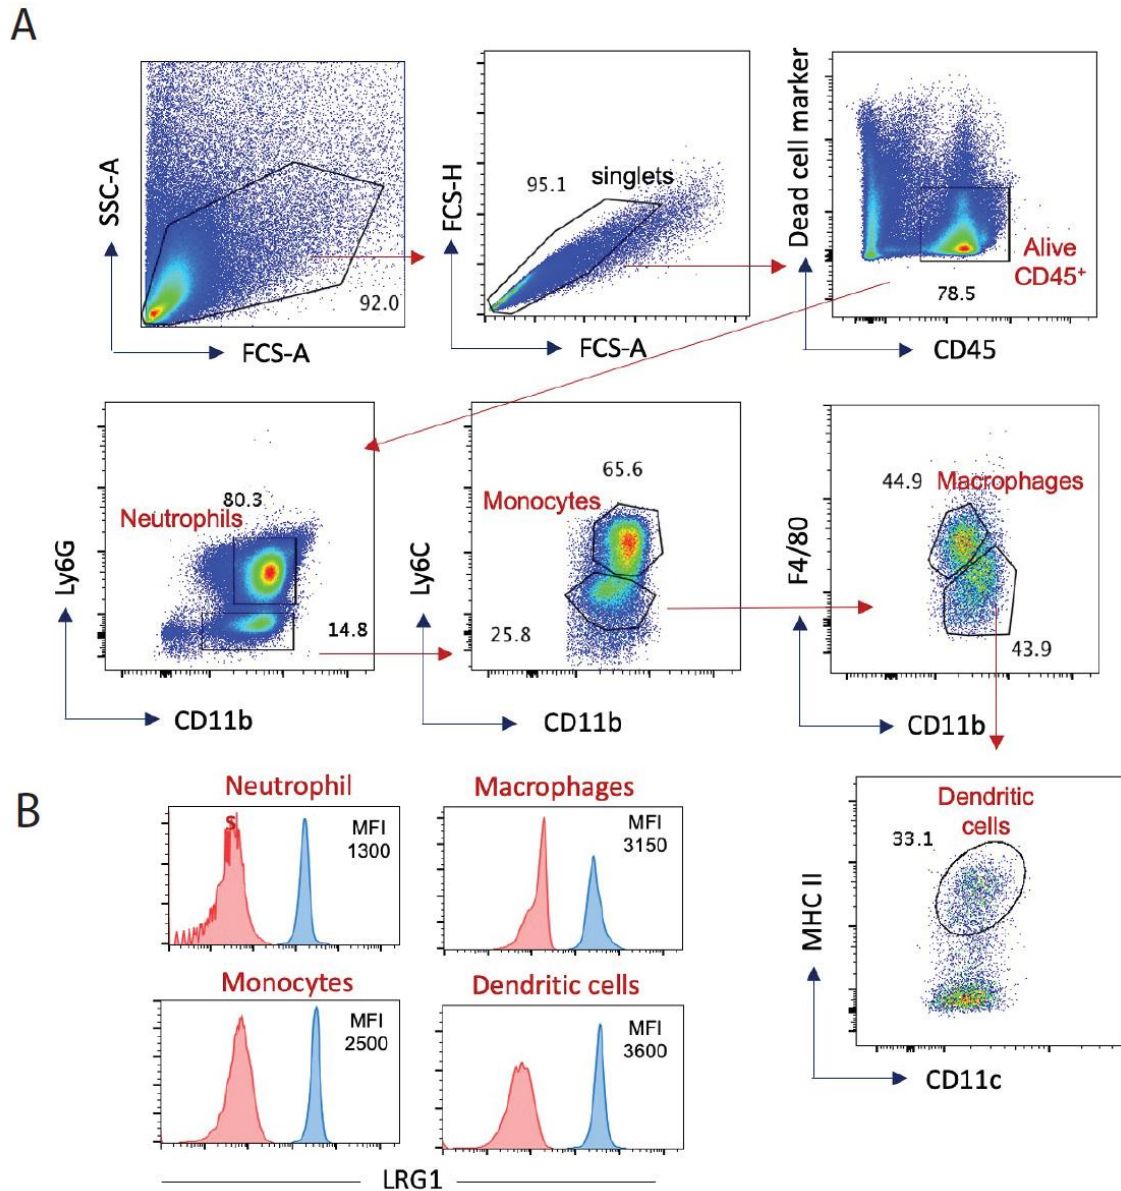

**Figure S2. Flow cytometry analysis of LRG1 expressing myeloid cells present in wounds.**

(A) Isolated cells were stained with anti CD45 (pan leukocyte), anti-Ly6G (neutrophils), anti Ly6C (monocytes), anti F4/80 (macrophages) and anti CD11c together with MHC class II (dendritic cells). (B) Histogram show the expression of Lrg1 in the correspondent myeloid population: blue histogram: anti-Lrg-1 Ab; red histogram: negative control. The mean of fluorescence intensity (MFI) indicates the expression level of Lrg1.

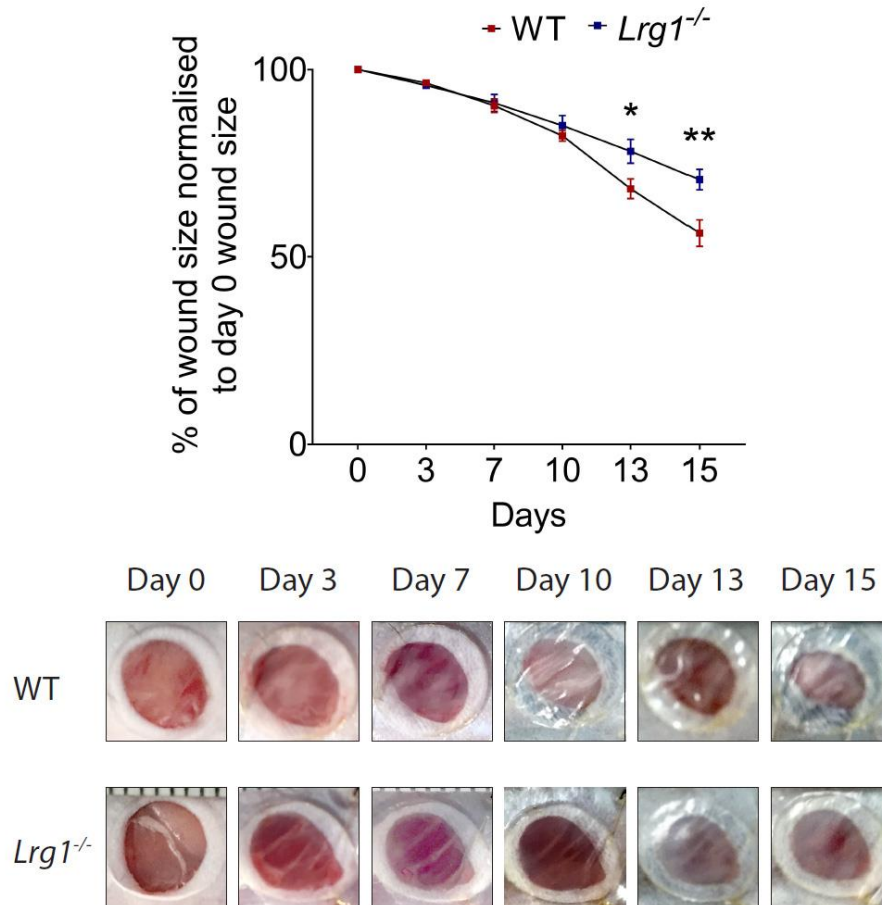

**Figure S3. Splinted excisional wound closure over time.** Representative pictures splinted wounds and quantification of wound closure immediately following injury, and 3, 7, 10, 13 and 15 days after wounding. Data represent mean  $\pm$  SEM of  $n = 7$  animals. Significance was determined by student's t-test. \* $p < 0.05$ , \*\* $p < 0.01$ .

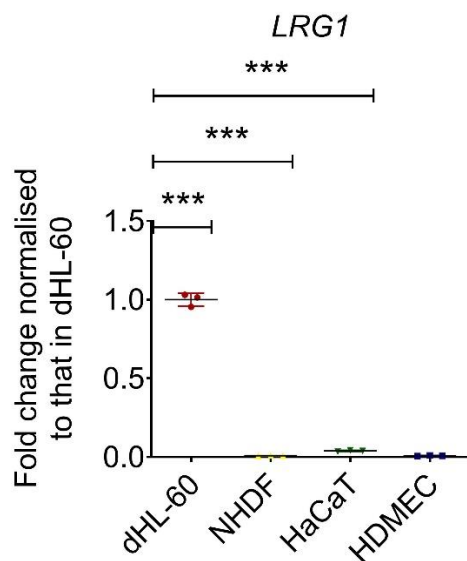

**Figure S4. LRG1 is expressed at a high level in dHL-60 cells.** qRT-PCR analysis demonstrated that LRG1 is highly expressed in dHL-60 cells. NHDF indicates normal human dermal fibroblasts, HaCaT is an immortalized human keratinocyte cell line, and HDEMC indicates human dermal microvascular endothelial cells. Data are represented as mean  $\pm$  SD of  $n = 3$  independent experiments. Significance was determined by one - way ANOVA followed by Tukey multiple comparisons test, \*\*\* $P < 0.001$ .

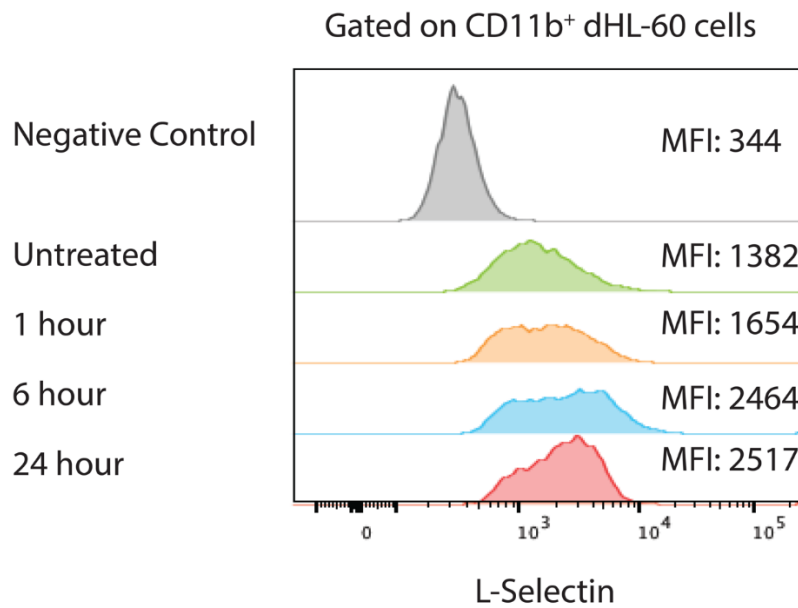

**Figure S5.** Representative flow cytometry results of rhLRG1-treated dHL-60 cells at different time points.

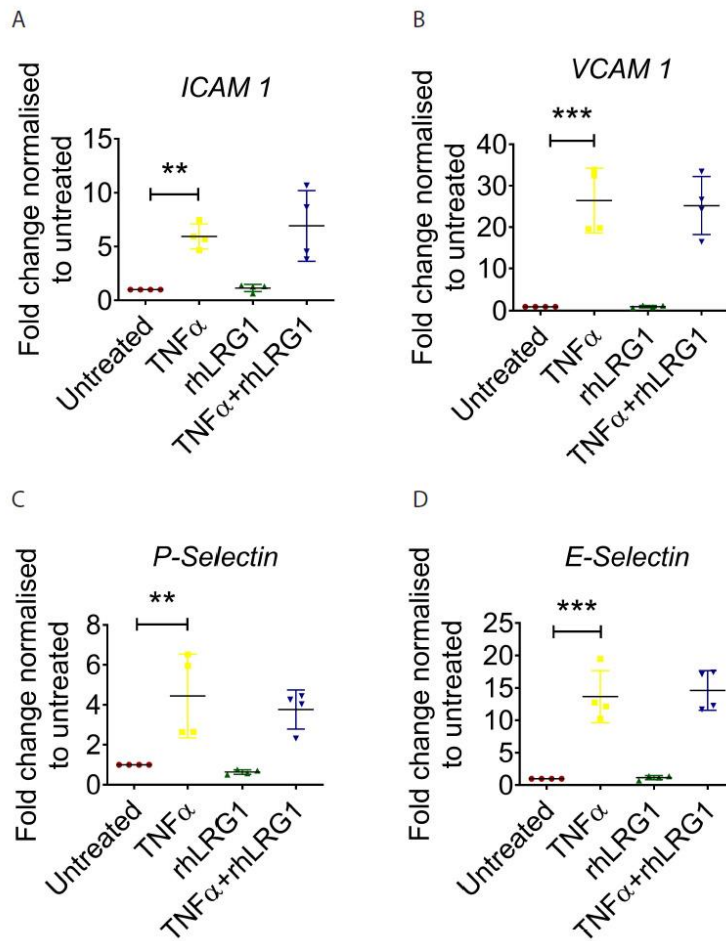

**Figure S6. rhLRG1 doesn't affect the TNF $\alpha$ -induced expression of endothelial adhesion molecules.** qRT-PCR analysis of the expression of endothelial adhesion molecules in the presence of TNF $\alpha$  and/or rhLRG1. Data are represented as mean  $\pm$  SD of n = 4 independent experiments. Significance was determined by one - way ANOVA followed by Tukey multiple comparisons test, \*\*P<0.01, \*\*\*P<0.001.

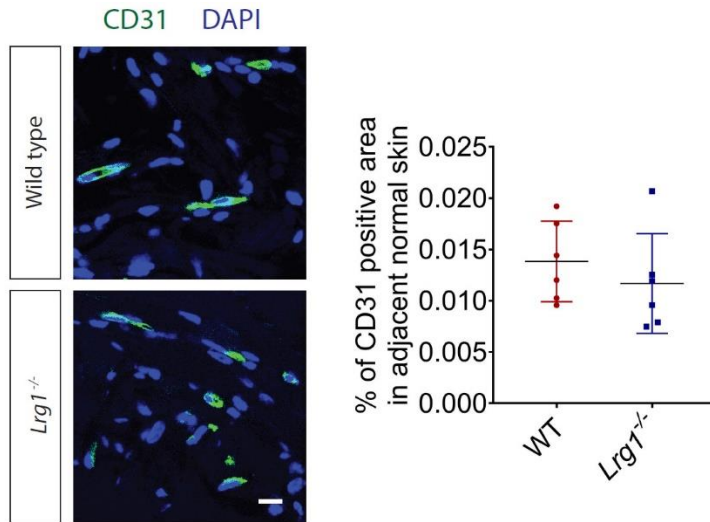

**Figure S7. Characterization of vascular density in the distal part of skin from wild-type and *Lrg1*<sup>-/-</sup> mice.** Representative immunofluorescence staining of CD31 (Green) and DAPI (blue) (left) and quantification of vessel density (right). Scale bar: 15μm. Data are represented as mean ± SD of n=6 mice. Significance was determined by student's t-test.

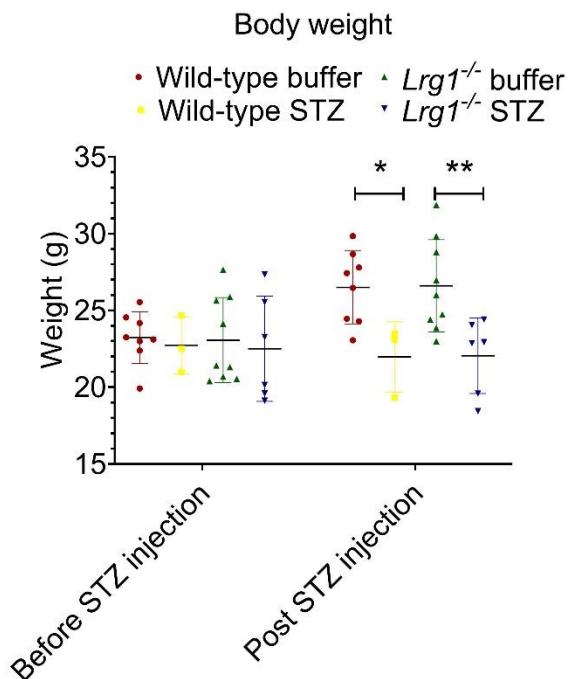

**Figure S8. The body weight in streptozotocin-induced diabetic wild-type and *Lrg1*<sup>-/-</sup> mice.**

Data are represented as mean ± SD of n > 6 animals. Significance was determined by two - way ANOVA followed by Tukey multiple comparisons test student's t-test. \*P<0.05, \*\*P<0.01.
